# Supplementary material for: Mapping global and local coevolution across 600 species to identify novel homologous recombination repair genes
Source: PubMed Central journal article supplement — Genome Res. 2019 Mar;29(3):439–48. doi: 10.1101/gr.241414.118 (PMC6396423; doi:10.1101/gr.241414.118), 2019-03
Supplement: supp_gr.241414.118_Supplemental_Fig_S2.pdf [file supp_gr.241414.118_Supplemental_Fig_S2.pdf]

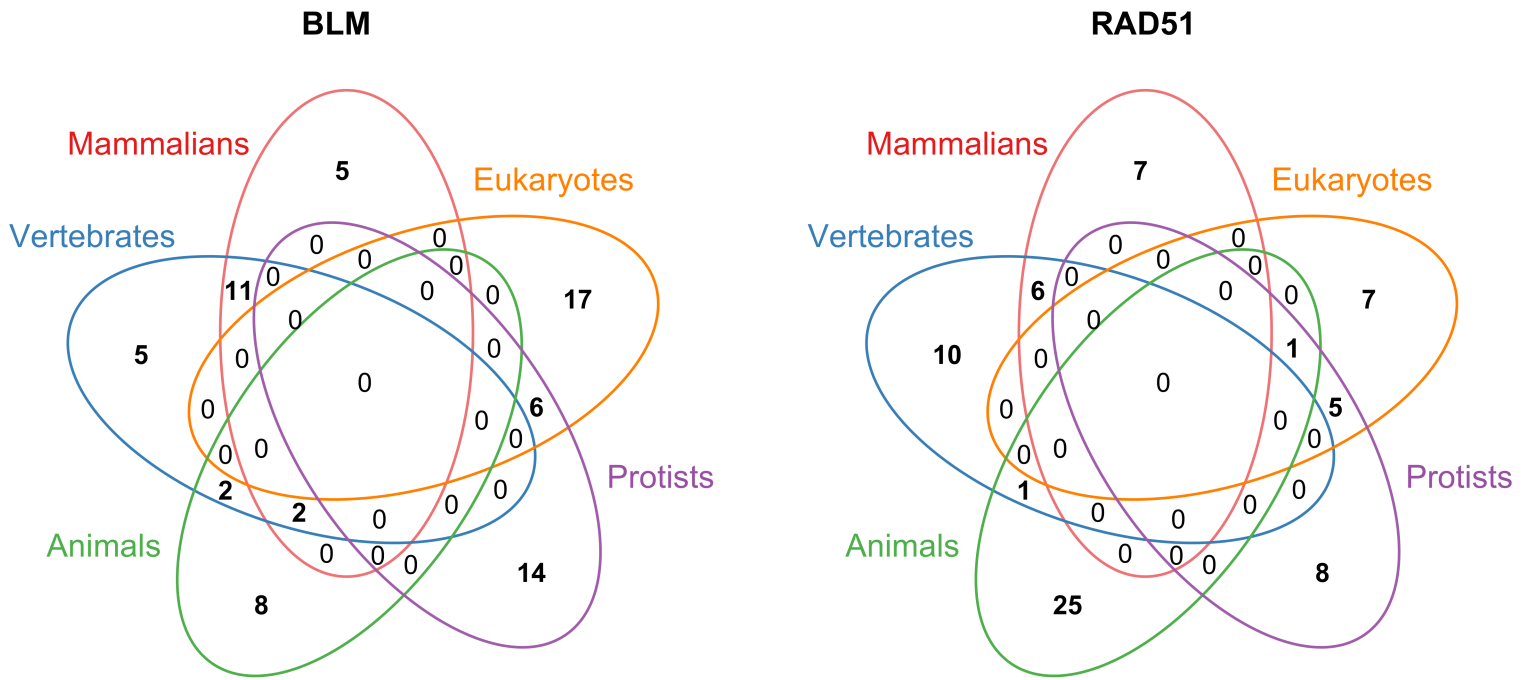

**Figure S2: Co-evolution of HRR genes.** The Venn diagrams show the overlap between the set of cell cycle and DNA repair genes co-evolved with BLM (left) and RAD51 (right) in diff150 erent clades. The numbers indicate the number of cell cycle and DNA repair genes among the top 50 co-evolved genes in the respective clade.
