# Supplementary material for: Mapping global and local coevolution across 600 species to identify novel homologous recombination repair genes
Source: HighWire-hosted journal article supplement (doi:10.1101/gr.241414.118), 2019-02-04
Supplement: Supplemental_Methods.docx [file Supplemental_Methods.docx]

***Supplementary Methods***

***C. elegans* and bacterial strains**

The strain used in this study, wild type BristolN2, was obtained from the Caenorhabditis Genetics Center (https://cgc.umn.edu). Worms were grown at 20°C on nematode growth medium (NGM) according to standard protocols. Worms were grown on OP50 bacterial lawns, except for RNAi feeding experiments where HT115 bacteria with the L4440 vector was used.

**RNAi knockdown**

RNAi knockdown was performed by feeding, using the *C. elegans* RNAi v WS112 Vidal Feeding Library, in the form of glycerol stocks of HT115 *E. coli*,with each strain expressing dsRNA against one *C. elegans* open reading frame. Strains were grown in LB containing Ampicillin (0.1 mg/ml) and were used to seed 6 cm NGM agar plates containing 50 mg/ml Carbenicillin. IPTG (1mM) was added to the bacterial lawn 24 hours post-seeding. N2 hermaphrodite adults were harvested and bleached (0.5 M NaOH and 1% NaOCl) to obtain eggs. The bleached eggs were synchronized to L1 in M9 buffer at 20 °C for 12h and transferred to RNAi plates.

**Irradiation**

L4 young hermaphrodites, second generation RNAi, were washed two times in M9 buffer and plated on 6-cm plates, 100worms/plate. After one hour, worms were exposed to 50 Gy of IR from a 60Co source (Gammacell 220 Excel, Nordion International Inc.). Two hours post-irradiation, worms were plated one worm per 6-cm dish and allowed to lay eggs for 36 hr before progeny count.

**Statistic analysis**

Statistical difference between the groups was analyzed by unpaired, single side Wilcox test using an R software package (version 1.0.153). The calculation of combined p-values was done by Fisher’s method.

**Cell culture**

All culture media were supplemented with 10% fetal bovine serum (FBS) and 1% Penicillin/Streptomycin (Wisent). U-2-OS (U2OS) DR-GFP cells were cultured in McCoy’s medium (Wisent). HeLa DR-GFP cells were cultured in DMEM (Wisent).

**DR-GFP assay**

A HeLa and a U2OS clone carrying the DR-GFP reporter were used for the analysis of HR. One million cells were seeded into 10 cm dishes. Twenty-four hours later, cells were treated with the indicated siRNAs using Lipofectamine RNAiMax (Invitrogen) and following the manufacturer’s protocol. The following day, cells were transfected with an empty vector (EV) or the I-SceI plasmid using Lipofectamine 2000 (Invitrogen). Two days later, cells were harvested by trypsinization, washed once with PBS 1X, and analyzed by flow cytometry to monitor the percentage of GFP-positive cells. The frequency of repair for each siRNA condition was normalized toward the control condition where the I-SceI vector was provided.

**RNA interference**

Unless stated otherwise, all siRNAs employed in this study were SMARTpools (Dharmacon). The following siRNAs were used for the DR-GFP assay: Ctrl (Dharmacon, D-001810-03-20), CtIP (Dharmacon, M-011376-00-20), NME1 (Dharmacon, MQ-006821-01-0002), RAN (Dharmacon, MQ-010353-00-0002), SMG1 (Dharmacon, MQ-005033-01-0002), UPF1 (Dharmacon, MQ-011763-01-0002), ELP4 (Dharmacon, MQ-016927-01-0002), FIGN (Dharmacon, MQ-010934-01-0002), RAB3GAP2 (Dharmacon, MQ-032255-01-0002), RASEF (Dharmacon, MQ-016768-01-0002), TNXDC9 (Dharmacon, MQ-012079-00-0002), WDR91 (Dharmacon, MQ-020659-00-0002), ZDHHC13 (Dharmacon, MQ-020510-02-0002).
