# Supplementary material for: Mapping global and local coevolution across 600 species to identify novel homologous recombination repair genes
Source: HighWire-hosted journal article supplement (doi:10.1101/gr.241414.118), 2019-02-04
Supplement: Supplemental_Table_S3.xlsx [file Supplemental_Table_S3.xlsx]

## Sheet: README
Table S3: Top 50 genes co-evolved with BLM and RAD51 in different clades.
Genes that are associated with cell cycle or DNA repair are highlighted.
On the right, the overlap between the cell cycle and DNA repair genes co-evolved with BLM or RAD51 in different clades.
The lower triangle indicates the number of cell cycle and DNA repair genes co-evolved with RAD51 in both clades.
The diagonal indicates the number of cell cycle and DNA repair genes among the top 50 genes co-evolved with RAD51 in each clade.
The upper triangle indicates the p-value for the size of the overlap (hypergeometric test with Bonferroni correction).

## Sheet: BLM
Mammalians	Vertebrates	Animals	Fungi	Plants	Protists	Eukaryotes			Mammalians	Vertebrates	Animals	Fungi	Plants	Protists	Eukaryotes
PNPLA8	PNPLA8	DAP3	RECQL	TAF5L	RECQL	RECQL		Mammalians	18	2.394e-27	0.02835	1	1	1	1
SUCO	SUCO	VRK1	RECQL5	ADRM1	RECQL5	RECQL5		Vertebrates	13	20	5.544e-06	1	1	1	1
XRCC4	AGGF1	DPM1	WRN	UBE3C	WRN	WRN		Animals	2	4	12	1	1	1	1
UBE3A	TOPBP1	ISY1-RAB43	RECQL4	TACC3	RECQL4	HELLS		Fungi	0	0	0	16	1	2.0118e-05	4.389e-07
LRRK2	SSB	ELP2	ATP11C	EME1	NEDD4	ATP11B		Plants	0	0	0	0	14	1	1
PPP1R12A	ATAD2	ISY1	ATP11A	PPME1	AREL1	SMARCA1		Protists	0	0	0	4	0	20	1.8165e-08
DAP3	CEP76	ASCC3	CDC20	WWC1	NEDD4L	CHD1L		Eukaryotes	0	0	0	5	0	6	23
ATAD2	SPDYE1	PSMD12	XPNPEP2	HIPK4	SMURF2	ATP11C
SPDYE4	SPDYE4	GPR152	KIF12	WARS2	HECW2	SMARCA5
TOPBP1	SPDYE16	NEUROG2	KIF24	SRA1	SMURF1	SKIV2L2
CEP350	FANCL	MYLK3	RARS2	ABCD3	HECW1	SMARCAD1
AGGF1	SPDYE2B	PUS3	ATP11B	ERCC2	HACE1	ATP8B4
SPDYE1	SPDYE2	SPDYE2	TARS2	WDR24	CHD8	ATP11A
BCO2	SPDYE6	SPDYE2B	ARL11	TAF5	SKIV2L2	KIFC2
MAATS1	SPDYE5	SPDYE6	TARS	DIEXF	ERCC6	ATP8A1
FANCL	AP5M1	NAA50	KIF2C	ABCD1	CHD9	DARS
VRK1	VRK1	ZNF793	TARSL2	VPS13B	DIS3	PPP2CA
SSB	CCDC174	SPAST	XPNPEP1	ABCD2	CHD6	PPP2CB
NUP205	CSPP1	MRPS33	CDC20B	ABCD4	DIS3L	ATP8B3
SPDYE16	UBE3A	RHNO1	BRIP1	UBE3B	CHD4	RAD54B
TBC1D23	PPP1R12A	SPDYE5	KIF2B	SLC9A8	CHD7	UBA6
SYCP1	DPM1	PNPLA8	RTEL1	PIK3R2	SMARCA1	PSMD14
RNF182	NUP205	DCXR	KIFC2	WDR82	HELLS	ATP8A2
WDPCP	XRCC4	PAPD4	ATP10B	PAK3	CHD3	ATP8B2
PSMD12	ELP2	SSB	RARS	VARS	CHD2	WARS
SPDYE5	NGF	MRPS6	CARS2	FAHD2A	SMARCA5	TARSL2
SASS6	PLCZ1	SPDYE1	KIF2A	DDX47	WWP2	SAR1B
CSPP1	DAP3	TBC1D23	ATP9A	EPS15L1	WWP1	DRG1
SPDYE6	RBM22	RBM22	KIF9	FAHD2B	ERCC6L	SAR1A
SPDYE2B	SASS6	SIAH3	KIF6	SLC9A5	ATP13A1	TARS2
SPDYE2	RNF182	EIF3E	KIF15	ANGEL1	CHD5	ACTL9
TBC1D31	SPDYE3	SEC24D	ARL10	POLR2C	ITCH	UBA7
CEP76	ULK4	RPS3	KIFC3	BRF1	CHD1	PMM2
ANKS4B	RPS3	CD46	HERC6	VARS2	HUWE1	PSMB5
GNL2	ANKS4B	RIOK2	ATP10D	MTRF1L	ATP10D	KIFC1
MPHOSPH8	LRRK2	KIF11	ATP10A	PAK1	ATP6V0D2	IARS
PLCZ1	LHCGR	BMPR1A	HFM1	HIPK3	EIF5B	ATP8B1
SLU7	PSMD12	TAZ	HERC3	TTC27	DRG2	KIF18B
CCDC174	MTRF1	CHIC1	EEF2	ECT2	POLA1	DIMT1
AP5M1	GPR152	NBPF15	ARL4D	FAHD1	ATP10A	PSMB8
KRIT1	SKA2	HEATR5A	KIF27	SLC9A2	ATP6V0A2	TARS
TRIP12	ZWILCH	GDF15	ATP8B4	GPD2	ATP6V0A4	PSMA5
YTHDC1	BCO2	SLCO1B1	KIF18B	RARS2	ATP11B	ARL14
NUCKS1	SCG2	C5orf47	SEC11C	PAK2	RAD54B	RARS2
USP16	RHNO1	IFT172	HERC4	MAP4K2	AGAP9	PPP1CB
C11orf54	CCAR1	NBPF1	ATP8A2	ABHD1	ATP10B	PPP6C
PURG	SUV420H1	KIFC2	KIF4A	POLE	ATP11A	PPP1CC
C7orf62	KRIT1	NBPF12	HERC5	RSL24D1	ATP11C	DRG2
DPM1	ICE2	LLPH	CDC42BPA	RQCD1	ATP8A1	PPP1CA
SKA3	YTHDC1	SPDYE16	ATP8B2	CPSF2	ATP8B4	ARL10

## Sheet: RAD51
Mammalians	Vertebrates	Animals	Fungi	Plants	Protists	Eukaryotes			Mammalians	Vertebrates	Animals	Fungi	Plants	Protists	Eukaryotes
DPP8	DIP2B	DMC1	DMC1	DMC1	DMC1	DMC1		Mammalians	13	1.0227e-10	1	1	1	1	1
DIP2B	PSMD14	YES1	RAD51B	XRCC3	RAD51B	RAD51B		Vertebrates	6	17	1	1	1	1	1
CDC27	DIP2A	FGR	RAD51C	BYSL	XRCC3	XRCC3		Animals	0	1	27	1	1	1	1
NOL10	NPEPPS	FYN	XRCC3	RAD51B	XRCC2	XRN2		Fungi	0	0	1	16	2.0979e-06	2.667e-08	6.636e-11
STK38	SNRNP40	SLC25A5	XRN2	RAD51C	CENPA	RAD51C		Plants	0	0	1	4	12	1.1571e-06	8.274e-07
PSMD14	NOL10	SRC	XRN1	POTEM	ZDHHC24	ABCE1		Protists	0	0	1	5	4	14	2.499e-11
MEP1B	SAR1B	SLC25A6	DDI1	POTEG	ZDHHC15	XRN1		Eukaryotes	0	0	1	6	4	6	13
DIP2A	PDK3	SLC25A31	XRCC2	ASB8	RAD51C	PPP5C
CDC73	STK38	MYH14	DDI2	ZDHHC13	ZDHHC22	STIP1
NPEPPS	UBE2E3	BTBD10	ZCCHC13	ASB7	ZDHHC20	UBA52
BTBD10	BTBD10	AKT3	TTC3	POTEH	ZDHHC12	DDI1
LEF1	RALA	SLC25A4	CNBP	FEM1B	ZDHHC2	TUBA4B
MTRF1	SAR1A	BLK	TERT	PSMD10	EIF4A1	FTSJ1
GABRA1	SHOC2	TXK	STIP1	CDKN2C	RAD51D	H3F3C
ADAM23	SLC39A9	SRP54	UPF1	ANKRD53	EIF4A2	ARL4A
DNAJC12	TAOK3	FRK	MYO18A	ZDHHC17	EIF4A3	HIST2H3PS2
TAOK3	CLIC4	GRAPL	PPP5C	STIP1	SBK2	HIST2H3C
PEX7	CAB39	HCK	MYO18B	GMEB1	ZMYM3	ZCCHC13
P4HA1	PPP6C	GRB2	ABCE1	NEIL2	RAB30	HIST1H3B
TAF2	ROCK1	LYN	MYH14	XAF1	RAB43	HIST3H3
UBE2E3	RBBP4	AKT1	MYH9	NRIP3	ZDHHC23	TUBA3C
SRP54	YES1	GRAP	MYH10	POTEC	CCT5	TUBA3E
GOSR1	ROCK2	AKT2	MYH11	POTEB2	RAB19	TUBA8
CHUK	TEAD1	UCK2	MYH1	ESPNL	ZDHHC21	TUBA4A
SLC39A9	KCTD6	GFPT1	FOXJ1	ANKRD30BL	TRIM65	TUBAL3
PPP6C	SEC23A	MAPK8	MYH7	ANKRD63	H3F3C	ARL17A
ING3	RGS6	CSK	HELZ2	TRAFD1	RAB33B	TUBA1A
TBX20	MED10	MAPK10	MYH13	NRIP2	TPT1	RAB3C
SNRNP40	SRP54	DDX1	SLF1	ANKRD24	HIST2H3C	RAB3D
FZD3	PRKAG1	NDUFV2	NRIP2	ANKRD2	EEF2	TUBA1B
TMEFF1	GABRA1	XRN2	MYH6	ENSP00000478796.1	PDIK1L	TUBA1C
KCTD6	PPA1	GFPT2	MYH2	TTC3	RAB27B	RAB3A
TMOD2	SEC61A1	UBE2B	FTSJ1	ANKRA2	HIST1H3B	ARL5A
GPBP1L1	TBX20	UBE2E3	MYH7B	POTEB3	RAB36	DRG1
KRIT1	PPP2CB	UBE2A	MUS81	FEM1C	RNF4	FTSJ2
DRD3	NAA15	VPS4B	MYH8	ANKRD62	HIST2H3PS2	ARL4D
SPAG9	KLHL13	HSPA1A	MYH4	MRTO4	RPL37A	ARL5B
DHX15	DHX15	HSPA1B	MYH3	ENSP00000479139.1	HIST3H3	ARL4C
GOLPH3L	PPP2CA	HSPA1L	XPR1	ASB3	RAB34	RAB3B
SLC25A14	HSPE1-MOB4	RAB2A	FOXK1	DHX8	WDR97	RAB2B
ST7L	UBE2E1	HPCAL4	MYH15	ANKRD20A3	RAB39B	RAB30
FLVCR1	FBXL20	ITCH	NRIP3	ASB12	TRIM60	CENPA
SHOC2	RPS12	PPP1CB	FOXK2	GPR75-ASB3	UBE2L6	ARL1
PRMT3	KLHL9	PRPS1L1	UBA52	TMF1	RAB33A	RAB2A
MSANTD3-TMEFF1	PIK3R3	PRPS1	FOXD4L4	POTED	ZDHHC19	RAB10
PPA1	GALNT1	PRPS2	FOXD4L5	ANKRD20A1	UBE2U	ENSP00000438507.1
ROCK2	NDST4	HSPA2	FOXD4L6	ANKRD20A4	SBK3	RAB22A
MREG	DIP2C	HSPA8	FOXL2	ASB18	TRIM7	RAB31
UBXN4	CTNNB1	SNX12	FOXD4L3	ANKRD20A2	PIM3	ARL5C
ROCK1	PRKD3	VSNL1	GPD1L	NFKBIA	UBL7	RAB39B
