# Supplementary material for: Mapping global and local coevolution across 600 species to identify novel homologous recombination repair genes
Source: HighWire-hosted journal article supplement (doi:10.1101/gr.241414.118), 2019-02-04
Supplement: Supplemental_Table_S5.xlsx [file Supplemental_Table_S5.xlsx]

## Sheet: README
Table S5: Summary of results of biological validation.
The table summarizes the results of the biological validation both in C. elegans and human cell lines.
For each gene we present the HRR gold standard gene it coevolved with, the clade in which the genes co-evolved,
the Pearson correlation in each clade, and the relative values of the DR-GFP assay in two cell lines,
and the results of the assay in C. elegans.

## Sheet: S5 
Gene	Co-evolved with	Clade in which co-evolution was observed (Pearson correlation between phylogentic profiles)	DR-GFP relative to control (HeLa)	DR-GFP p-value (HeLa)	DR-GFP relative to control (U2OS)	DR-GFP p-value (U2OS)	Orthologues in C. elegans	Brood size reduction (estimate RNAi/EV)
RAN	CHEK2	Plants (0.85)	17.16	0.0002	16.14	< 0.0001	ran-1	Embryonic lethal
TXNDC9	MND1, PSMC3IP	Fungi (0.57, 0.45)	37.87	<0.0001	48.82	< 0.0001	txdc-9	Embryonic lethal
RAB3GAP2	FANCD2,FANCI	Fungi (0.92, 0.85)	41.35	<0.0001	75.54	0.0025	rbg-2	0.63 (p<0.0001)
SMG1	ATM, ATR	Protists (0.88,0.94)	49.49	0.0004	34.3	< 0.0001	smg-1	0.49 (p<0.0001)
NME1	H2AFX	Animals (0.88), Plants (0.92)	53.97	<0.0001	54.29	< 0.0001	ndk-1	Embryonic lethal
FIGN	RAD51, RAD51B, RAD51C, RAD51D, DMC1, XRCC3	Eukaryotes	59.86	0.0056	48.61	< 0.0001	figl-1	Embryonic lethal
ZDHHC13	RAD51, RAD51B, RAD51C, DMC1, XRCC3	Plants	63.66	0.0043	64.25	< 0.0001	dhhc-13	NS
UPF1	DNA2	Protists (0.71)	67.92	0.0167	36.37	< 0.0001	smg-2	0.45 (p<0.0001)
ELP4	BRCA1,BARD1	Plants (0.78), Mammlians (0.65)	74.32	0.0942	60.23	< 0.0001	elpc-4	0.67 (p<0.05)
WDR91	FANCD2,FANCI	Eukaryotes (0.76, 0.71)	95.39	0.6925	60.41	< 0.0001	sorf-1	NS
RASEF	RAD51, RAD51B, RAD51C, RAD51D, DMC1, XRCC3	Eukaryotes	111.01	0.5555	74.59	NA	rsef-1	0.745 (p<0.001)
FCHO1	FANCD2,FANCI	Plants (0.75, 0.73)	NA	NA	NA	NA	fcho-1	0.765 (p=0.01)
ABCE1	RAD51, RAD51B, RAD51C, DMC1, XRCC2, XRCC3	Fungi	NA	NA	NA	NA	abce-1	Embryonic lethal
AP3M1	RAD54L2,ATRX	Protists (0.80, 0.72)	NA	NA	NA	NA	apm-1	Embryonic lethal
CREB3	PALB2,BRCA1	Mammlians (0.66,0.59)	NA	NA	NA	NA	let-607	Embryonic lethal
NSA2	PALB2,BRCA1	Mammlians (0.84, 0.68)	NA	NA	NA	NA	W09C5.1	Embryonic lethal
SEC11A/SEC11C	RECQL4, RECQL5, BLM, WRN	Fungi	NA	NA	NA	NA	Y54E10BR.5	Embryonic lethal
BUD23	RECQL5, WRN	Protists (0.60, 0.57)	NA	NA	NA	NA	C27F2.4	Embryonic lethal
